# Supplementary material for: Nonvolatile liquid anthracenes for facile full-colour luminescence tuning at single blue-light excitation
Source: Springer Nature journal article supplement (doi:10.1038/ncomms2969), 2013-06-05
Supplement: 41467_2013_BFncomms2969_MOESM3_ESM.mol [file 41467_2013_BFncomms2969_MOESM3_ESM.mol]

  ChemDraw05211312232D

102106  0  0  0  0  0  0  0  0999 V2000
   -2.1434    0.4125    0.0000 C   0  0  0  0  0  0  0  0  0  0  0  0
   -2.1434   -0.4125    0.0000 C   0  0  0  0  0  0  0  0  0  0  0  0
   -1.4289   -0.8250    0.0000 C   0  0  0  0  0  0  0  0  0  0  0  0
   -0.7145   -0.4125    0.0000 C   0  0  0  0  0  0  0  0  0  0  0  0
   -0.7145    0.4125    0.0000 C   0  0  0  0  0  0  0  0  0  0  0  0
   -1.4289    0.8250    0.0000 C   0  0  0  0  0  0  0  0  0  0  0  0
   -0.0000   -0.8250    0.0000 C   0  0  0  0  0  0  0  0  0  0  0  0
    0.7145   -0.4125    0.0000 C   0  0  0  0  0  0  0  0  0  0  0  0
    0.7145    0.4125    0.0000 C   0  0  0  0  0  0  0  0  0  0  0  0
   -0.0000    0.8250    0.0000 C   0  0  0  0  0  0  0  0  0  0  0  0
    1.4289   -0.8250    0.0000 C   0  0  0  0  0  0  0  0  0  0  0  0
    2.1434   -0.4125    0.0000 C   0  0  0  0  0  0  0  0  0  0  0  0
    2.1434    0.4125    0.0000 C   0  0  0  0  0  0  0  0  0  0  0  0
    1.4289    0.8250    0.0000 C   0  0  0  0  0  0  0  0  0  0  0  0
   -0.0000    1.6500    0.0000 C   0  0  0  0  0  0  0  0  0  0  0  0
   -0.0000   -1.6500    0.0000 C   0  0  0  0  0  0  0  0  0  0  0  0
   -0.7145   -2.0625    0.0000 C   0  0  0  0  0  0  0  0  0  0  0  0
   -0.7145   -2.8875    0.0000 C   0  0  0  0  0  0  0  0  0  0  0  0
   -0.0000   -3.3000    0.0000 C   0  0  0  0  0  0  0  0  0  0  0  0
    0.7145   -2.8875    0.0000 C   0  0  0  0  0  0  0  0  0  0  0  0
    0.7145   -2.0625    0.0000 C   0  0  0  0  0  0  0  0  0  0  0  0
    0.7145    2.0625    0.0000 C   0  0  0  0  0  0  0  0  0  0  0  0
    0.7145    2.8875    0.0000 C   0  0  0  0  0  0  0  0  0  0  0  0
   -0.0000    3.3000    0.0000 C   0  0  0  0  0  0  0  0  0  0  0  0
   -0.7145    2.8875    0.0000 C   0  0  0  0  0  0  0  0  0  0  0  0
   -0.7145    2.0625    0.0000 C   0  0  0  0  0  0  0  0  0  0  0  0
    1.4289    3.3000    0.0000 O   0  0  0  0  0  0  0  0  0  0  0  0
    2.1434    2.8875    0.0000 C   0  0  0  0  0  0  0  0  0  0  0  0
    2.8579    3.3000    0.0000 C   0  0  0  0  0  0  0  0  0  0  0  0
    3.5724    2.8875    0.0000 C   0  0  0  0  0  0  0  0  0  0  0  0
    4.2868    3.3000    0.0000 C   0  0  0  0  0  0  0  0  0  0  0  0
    5.0013    2.8875    0.0000 C   0  0  0  0  0  0  0  0  0  0  0  0
    5.7158    3.3000    0.0000 C   0  0  0  0  0  0  0  0  0  0  0  0
    6.4302    2.8875    0.0000 C   0  0  0  0  0  0  0  0  0  0  0  0
    7.1447    3.3000    0.0000 C   0  0  0  0  0  0  0  0  0  0  0  0
    2.8579    4.1250    0.0000 C   0  0  0  0  0  0  0  0  0  0  0  0
    3.5724    4.5375    0.0000 C   0  0  0  0  0  0  0  0  0  0  0  0
    4.2868    4.1250    0.0000 C   0  0  0  0  0  0  0  0  0  0  0  0
    5.0013    4.5375    0.0000 C   0  0  0  0  0  0  0  0  0  0  0  0
    5.7158    4.1250    0.0000 C   0  0  0  0  0  0  0  0  0  0  0  0
    6.4302    4.5375    0.0000 C   0  0  0  0  0  0  0  0  0  0  0  0
    7.1447    4.1250    0.0000 C   0  0  0  0  0  0  0  0  0  0  0  0
    7.8592    4.5375    0.0000 C   0  0  0  0  0  0  0  0  0  0  0  0
    5.0013    2.0625    0.0000 C   0  0  0  0  0  0  0  0  0  0  0  0
    5.7158    4.9500    0.0000 C   0  0  0  0  0  0  0  0  0  0  0  0
    1.4289   -3.3000    0.0000 O   0  0  0  0  0  0  0  0  0  0  0  0
    2.1434   -2.8875    0.0000 C   0  0  0  0  0  0  0  0  0  0  0  0
    2.8579   -3.3000    0.0000 C   0  0  0  0  0  0  0  0  0  0  0  0
    3.5724   -2.8875    0.0000 C   0  0  0  0  0  0  0  0  0  0  0  0
    4.2868   -3.3000    0.0000 C   0  0  0  0  0  0  0  0  0  0  0  0
    5.0013   -2.8875    0.0000 C   0  0  0  0  0  0  0  0  0  0  0  0
    5.7158   -3.3000    0.0000 C   0  0  0  0  0  0  0  0  0  0  0  0
    6.4302   -2.8875    0.0000 C   0  0  0  0  0  0  0  0  0  0  0  0
    7.1447   -3.3000    0.0000 C   0  0  0  0  0  0  0  0  0  0  0  0
    2.8579   -4.1250    0.0000 C   0  0  0  0  0  0  0  0  0  0  0  0
    3.5724   -4.5375    0.0000 C   0  0  0  0  0  0  0  0  0  0  0  0
    4.2868   -4.1250    0.0000 C   0  0  0  0  0  0  0  0  0  0  0  0
    5.0013   -4.5375    0.0000 C   0  0  0  0  0  0  0  0  0  0  0  0
    5.7158   -4.1250    0.0000 C   0  0  0  0  0  0  0  0  0  0  0  0
    6.4302   -4.5375    0.0000 C   0  0  0  0  0  0  0  0  0  0  0  0
    7.1447   -4.1250    0.0000 C   0  0  0  0  0  0  0  0  0  0  0  0
    7.8592   -4.5375    0.0000 C   0  0  0  0  0  0  0  0  0  0  0  0
    5.0013   -2.0625    0.0000 C   0  0  0  0  0  0  0  0  0  0  0  0
    5.7158   -4.9500    0.0000 C   0  0  0  0  0  0  0  0  0  0  0  0
   -1.4289    3.3000    0.0000 O   0  0  0  0  0  0  0  0  0  0  0  0
   -2.1434    2.8875    0.0000 C   0  0  0  0  0  0  0  0  0  0  0  0
   -2.8579    3.3000    0.0000 C   0  0  0  0  0  0  0  0  0  0  0  0
   -3.5724    2.8875    0.0000 C   0  0  0  0  0  0  0  0  0  0  0  0
   -4.2868    3.3000    0.0000 C   0  0  0  0  0  0  0  0  0  0  0  0
   -5.0013    2.8875    0.0000 C   0  0  0  0  0  0  0  0  0  0  0  0
   -5.7158    3.3000    0.0000 C   0  0  0  0  0  0  0  0  0  0  0  0
   -6.4302    2.8875    0.0000 C   0  0  0  0  0  0  0  0  0  0  0  0
   -7.1447    3.3000    0.0000 C   0  0  0  0  0  0  0  0  0  0  0  0
   -2.8579    4.1250    0.0000 C   0  0  0  0  0  0  0  0  0  0  0  0
   -3.5724    4.5375    0.0000 C   0  0  0  0  0  0  0  0  0  0  0  0
   -4.2868    4.1250    0.0000 C   0  0  0  0  0  0  0  0  0  0  0  0
   -5.0013    4.5375    0.0000 C   0  0  0  0  0  0  0  0  0  0  0  0
   -5.7158    4.1250    0.0000 C   0  0  0  0  0  0  0  0  0  0  0  0
   -6.4302    4.5375    0.0000 C   0  0  0  0  0  0  0  0  0  0  0  0
   -7.1447    4.1250    0.0000 C   0  0  0  0  0  0  0  0  0  0  0  0
   -7.8592    4.5375    0.0000 C   0  0  0  0  0  0  0  0  0  0  0  0
   -5.0013    2.0625    0.0000 C   0  0  0  0  0  0  0  0  0  0  0  0
   -5.7158    4.9500    0.0000 C   0  0  0  0  0  0  0  0  0  0  0  0
   -1.4289   -3.3000    0.0000 O   0  0  0  0  0  0  0  0  0  0  0  0
   -2.1434   -2.8875    0.0000 C   0  0  0  0  0  0  0  0  0  0  0  0
   -2.8579   -3.3000    0.0000 C   0  0  0  0  0  0  0  0  0  0  0  0
   -3.5724   -2.8875    0.0000 C   0  0  0  0  0  0  0  0  0  0  0  0
   -4.2868   -3.3000    0.0000 C   0  0  0  0  0  0  0  0  0  0  0  0
   -5.0013   -2.8875    0.0000 C   0  0  0  0  0  0  0  0  0  0  0  0
   -5.7158   -3.3000    0.0000 C   0  0  0  0  0  0  0  0  0  0  0  0
   -6.4302   -2.8875    0.0000 C   0  0  0  0  0  0  0  0  0  0  0  0
   -7.1447   -3.3000    0.0000 C   0  0  0  0  0  0  0  0  0  0  0  0
   -2.8579   -4.1250    0.0000 C   0  0  0  0  0  0  0  0  0  0  0  0
   -3.5724   -4.5375    0.0000 C   0  0  0  0  0  0  0  0  0  0  0  0
   -4.2868   -4.1250    0.0000 C   0  0  0  0  0  0  0  0  0  0  0  0
   -5.0013   -4.5375    0.0000 C   0  0  0  0  0  0  0  0  0  0  0  0
   -5.7158   -4.1250    0.0000 C   0  0  0  0  0  0  0  0  0  0  0  0
   -6.4302   -4.5375    0.0000 C   0  0  0  0  0  0  0  0  0  0  0  0
   -7.1447   -4.1250    0.0000 C   0  0  0  0  0  0  0  0  0  0  0  0
   -7.8592   -4.5375    0.0000 C   0  0  0  0  0  0  0  0  0  0  0  0
   -5.0013   -2.0625    0.0000 C   0  0  0  0  0  0  0  0  0  0  0  0
   -5.7158   -4.9500    0.0000 C   0  0  0  0  0  0  0  0  0  0  0  0
  1  2  2  0      
  2  3  1  0      
  3  4  2  0      
  4  5  1  0      
  5  6  2  0      
  6  1  1  0      
  4  7  1  0      
  7  8  2  0      
  8  9  1  0      
  9 10  2  0      
 10  5  1  0      
  8 11  1  0      
 11 12  2  0      
 12 13  1  0      
 13 14  2  0      
 14  9  1  0      
 10 15  1  0      
  7 16  1  0      
 16 17  2  0      
 17 18  1  0      
 18 19  2  0      
 19 20  1  0      
 20 21  2  0      
 21 16  1  0      
 15 22  2  0      
 22 23  1  0      
 23 24  2  0      
 24 25  1  0      
 25 26  2  0      
 26 15  1  0      
 25 65  1  0      
 23 27  1  0      
 20 46  1  0      
 18 84  1  0      
 27 28  1  0      
 28 29  1  0      
 29 30  1  0      
 30 31  1  0      
 31 32  1  0      
 32 33  1  0      
 33 34  1  0      
 34 35  1  0      
 29 36  1  0      
 36 37  1  0      
 37 38  1  0      
 38 39  1  0      
 39 40  1  0      
 40 41  1  0      
 41 42  1  0      
 42 43  1  0      
 32 44  1  0      
 40 45  1  0      
 46 47  1  0      
 47 48  1  0      
 48 49  1  0      
 49 50  1  0      
 50 51  1  0      
 51 52  1  0      
 52 53  1  0      
 53 54  1  0      
 48 55  1  0      
 55 56  1  0      
 56 57  1  0      
 57 58  1  0      
 58 59  1  0      
 59 60  1  0      
 60 61  1  0      
 61 62  1  0      
 51 63  1  0      
 59 64  1  0      
 65 66  1  0      
 66 67  1  0      
 67 68  1  0      
 68 69  1  0      
 69 70  1  0      
 70 71  1  0      
 71 72  1  0      
 72 73  1  0      
 67 74  1  0      
 74 75  1  0      
 75 76  1  0      
 76 77  1  0      
 77 78  1  0      
 78 79  1  0      
 79 80  1  0      
 80 81  1  0      
 70 82  1  0      
 78 83  1  0      
 84 85  1  0      
 85 86  1  0      
 86 87  1  0      
 87 88  1  0      
 88 89  1  0      
 89 90  1  0      
 90 91  1  0      
 91 92  1  0      
 86 93  1  0      
 93 94  1  0      
 94 95  1  0      
 95 96  1  0      
 96 97  1  0      
 97 98  1  0      
 98 99  1  0      
 99100  1  0      
 89101  1  0      
 97102  1  0      
M  END
