# Supplementary material for: Nonvolatile liquid anthracenes for facile full-colour luminescence tuning at single blue-light excitation
Source: PubMed Central journal article supplement (PMC3709479; doi:10.1038/ncomms2969), 2013-06-05
Supplement: ncomms2969-s1.pdf [file ncomms2969-s1.pdf]

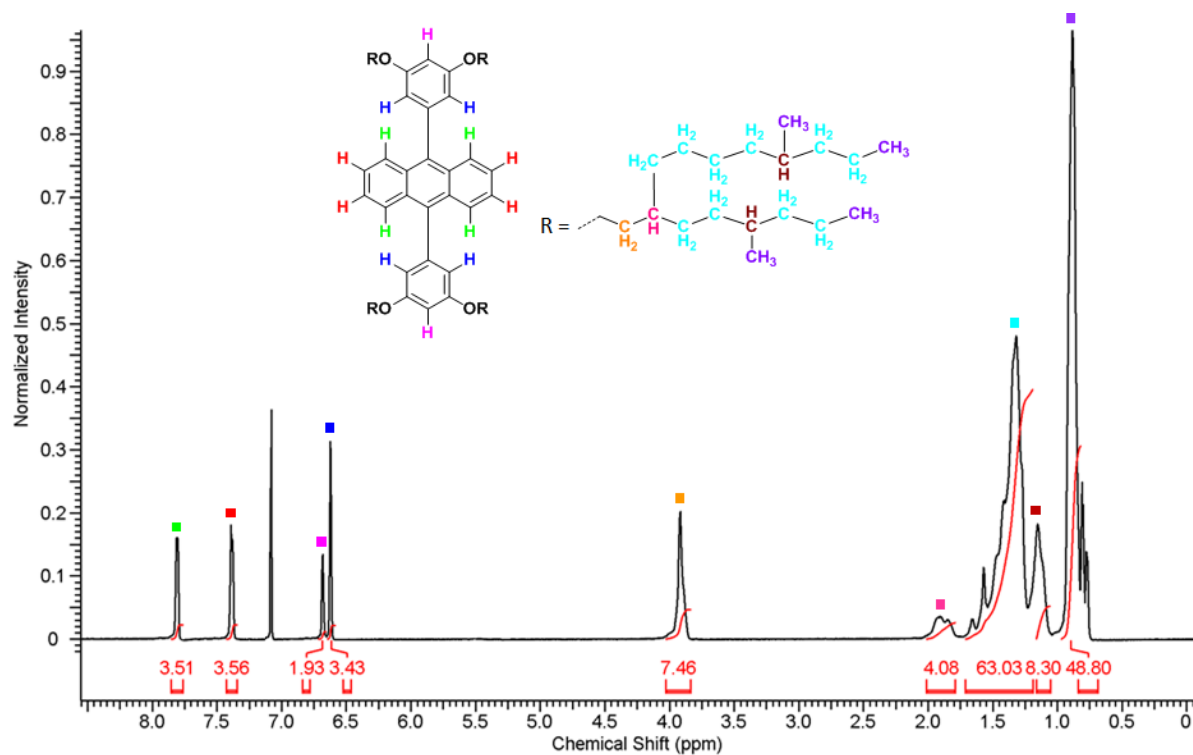

**Supplementary Figure S2 |  $^1\text{H}$  NMR characterization of a solvent-free fluid 2.**  $^1\text{H}$  NMR spectrum of **2** in  $\text{CDCl}_3$ , after evaporating from  $\text{CH}_2\text{Cl}_2$  and drying under vacuum. The absence of peaks corresponding to  $\text{CH}_2\text{Cl}_2$  in the NMR spectrum clearly states that the fluid characteristic is the inherent behaviour of the single liquid component, and not due to the trapped solvent molecules.

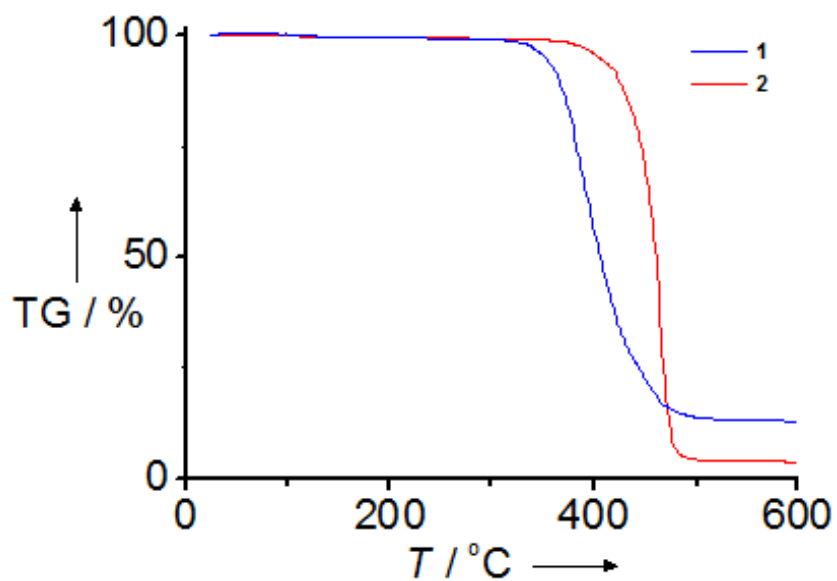

**Supplementary Figure S3 | Thermogravimetric characterization of solvent-free fluids.**

Thermogravimetric analysis of liquid anthracenes **1** and **2**. The mass loss% at 300 °C was found to be 1.13% (**1**) and 0.77% (**2**).

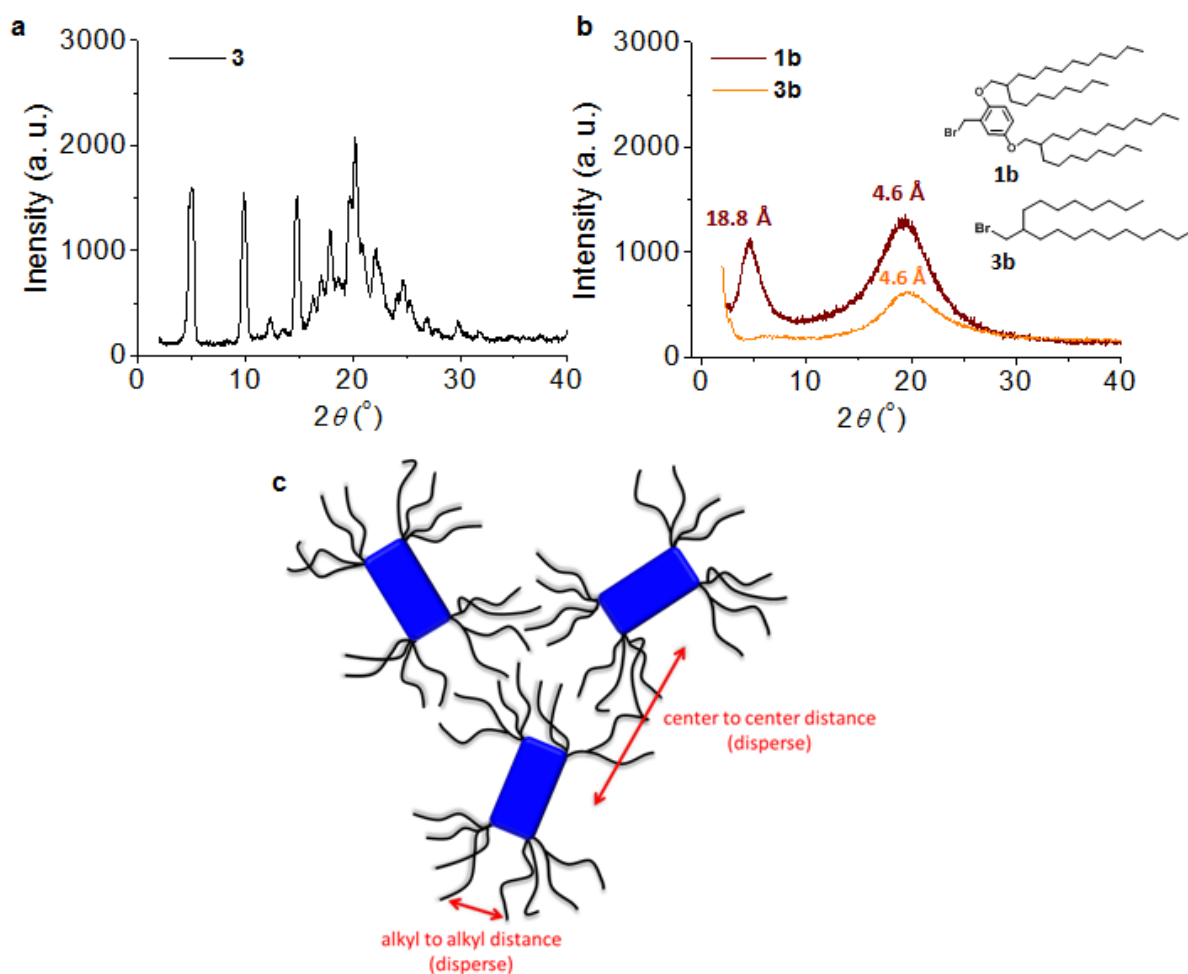

**Supplementary Figure S4 | X-ray diffraction studies.** XRD diagrams of (a) **3** and (b) **1b** and **3b**. (c) Schematic illustration of the distance information corresponding to XRD analysis of **1** and **2**. XRD of the precursor molecules indicates that in the case of **3b** only one halo corresponding to branched alkyl chains in a molten state is present, whereas when it is equipped on a benzyl bromide, **1b**, one more additional halo from the aromatic moiety appears. It clearly indicates that the two halos in the case of liquid anthracenes (**1** and **2**) correspond to the average distance of the aromatic and aliphatic moieties of the molecules in their molten phases. Compound **3**, on the other hand, exhibits crystalline reflexes due to its higher organization in the solid state.

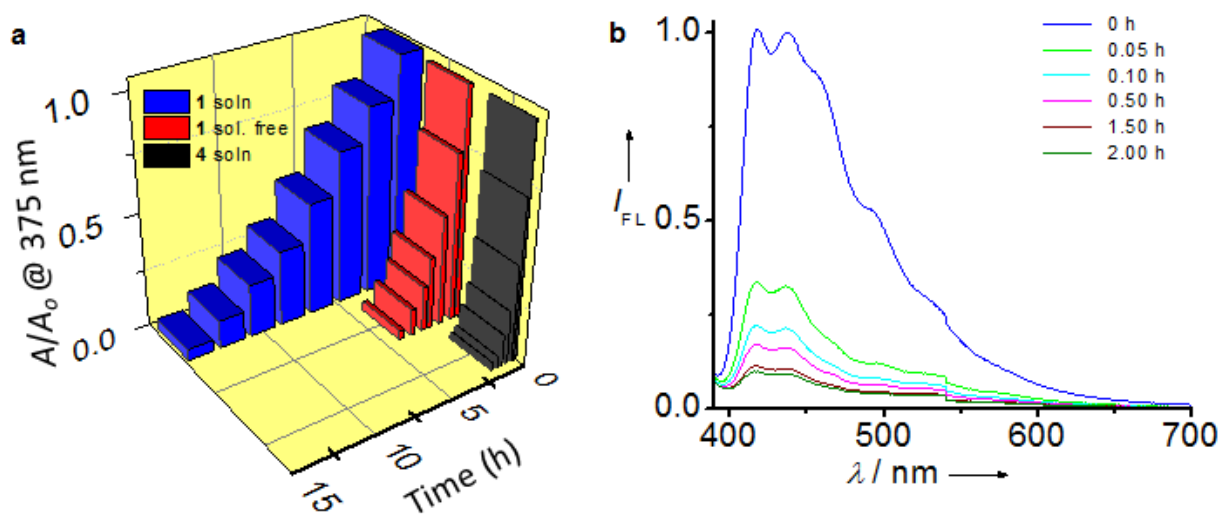

**Supplementary Figure S5 | Photostability of anthracenes.** (a) Comparison of the variation of absorbance at 375 nm in the solvent free-bulk liquid state of **1** (sol. free) supported on quartz plate and in dichloromethane solution (soln) ( $c = 1 \times 10^{-4}$  M,  $l = 1$  mm,  $\lambda_{\text{ex}} = 375$  nm) of **1** and **4**. (b) Comparison of the variation of emission spectra of **4** cast thin film by irradiating at 365 nm using a Xe lamp ( $100 \text{ W m}^{-2}$ ).

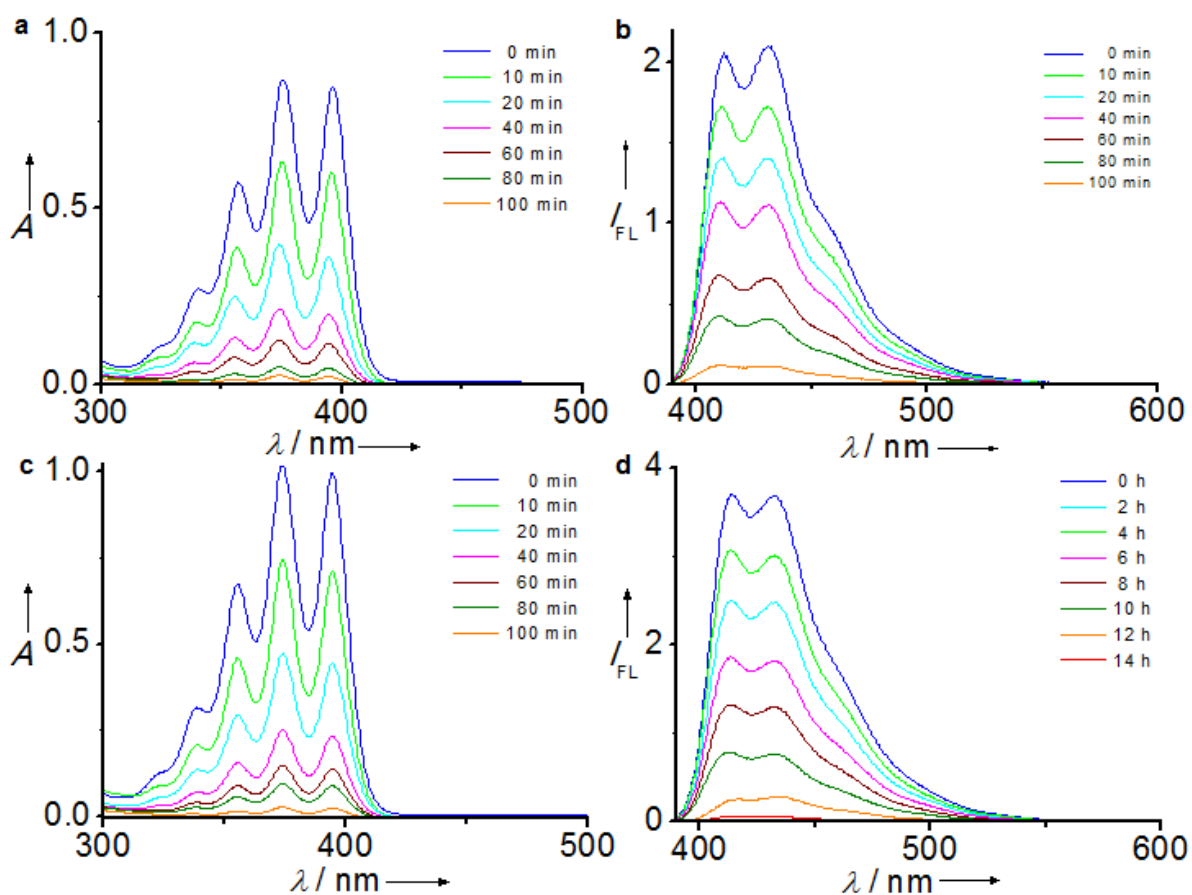

**Supplementary Figure S6 | Fluorescence changes of **4** upon photo irradiation.** Comparison of the variation of absorption (left; **a** and **c**) and emission (right; **b** and **d**) spectra of **4** in (**a**) and (**b**) dichloromethane and (**c**) and (**d**) in THF solutions by irradiating at 365 nm using a Xe lamp ( $100 \text{ W m}^{-2}$ ).

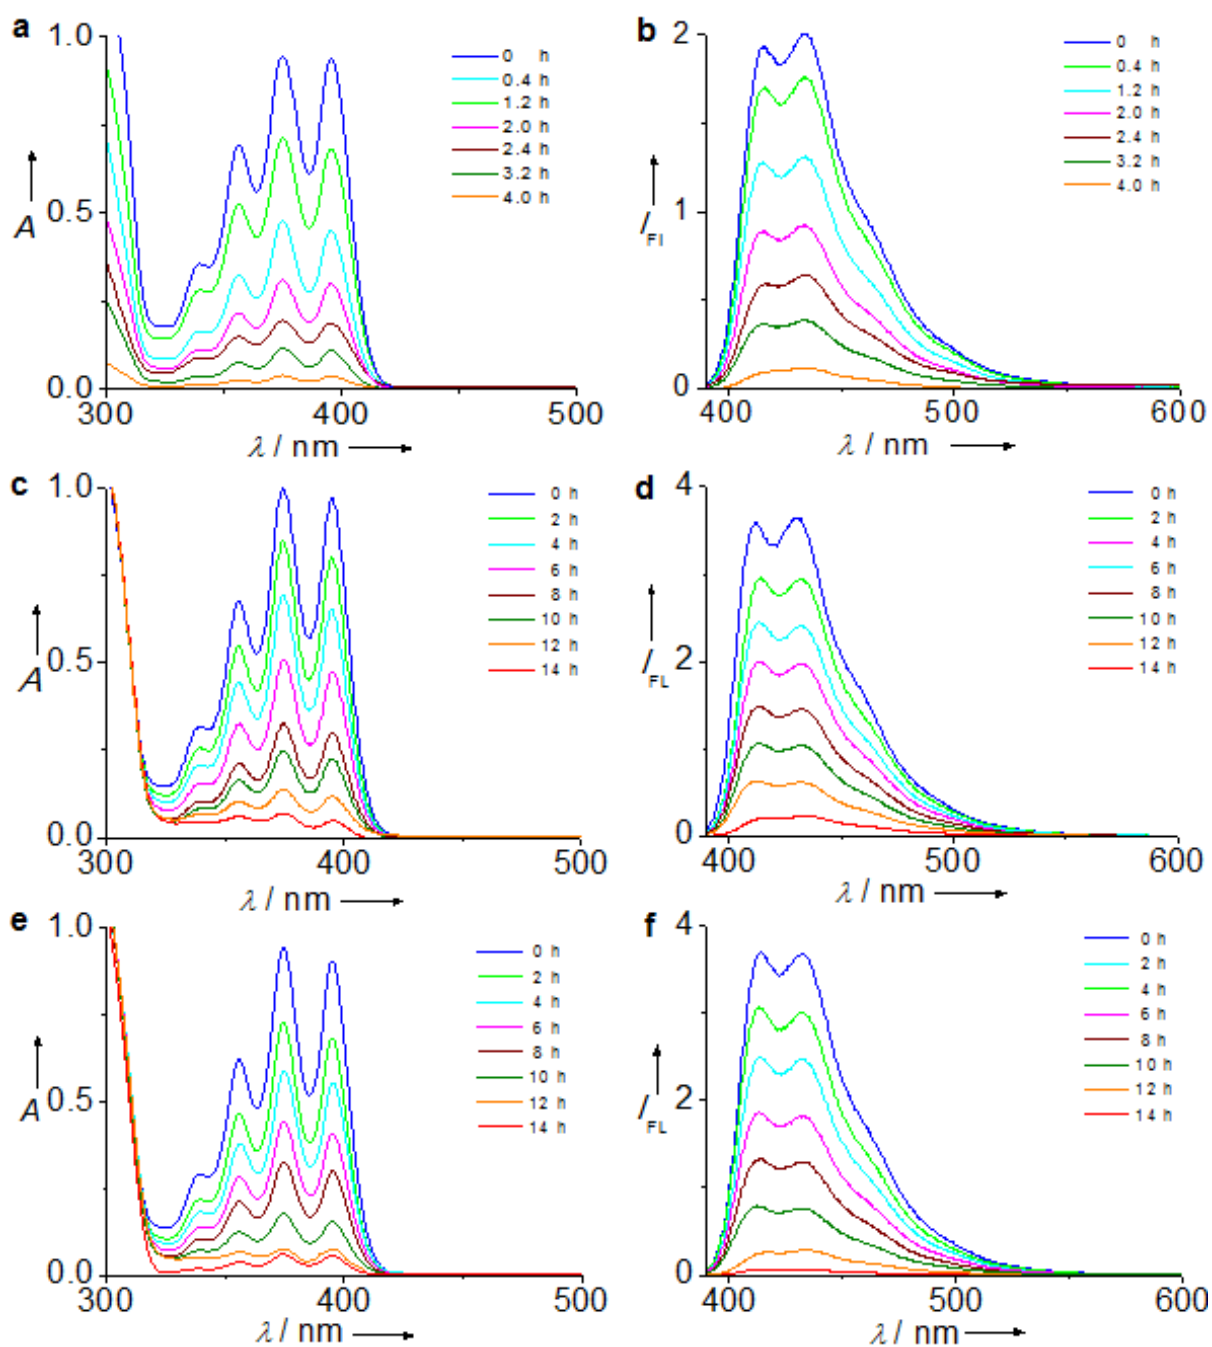

**Supplementary Figure S7 | Fluorescence changes of 1 upon photo irradiation.**

Comparison of the variation of absorption (left; **a**, **c**, **e**) and emission (right; **b**, **d**, **f**) spectra of **1** in the (a) and (b) solvent-free films, (c) and (d) dichloromethane and (e) and (f) THF, with time upon irradiating at 365 nm using a Xe lamp ( $100 \text{ W m}^{-2}$ ).

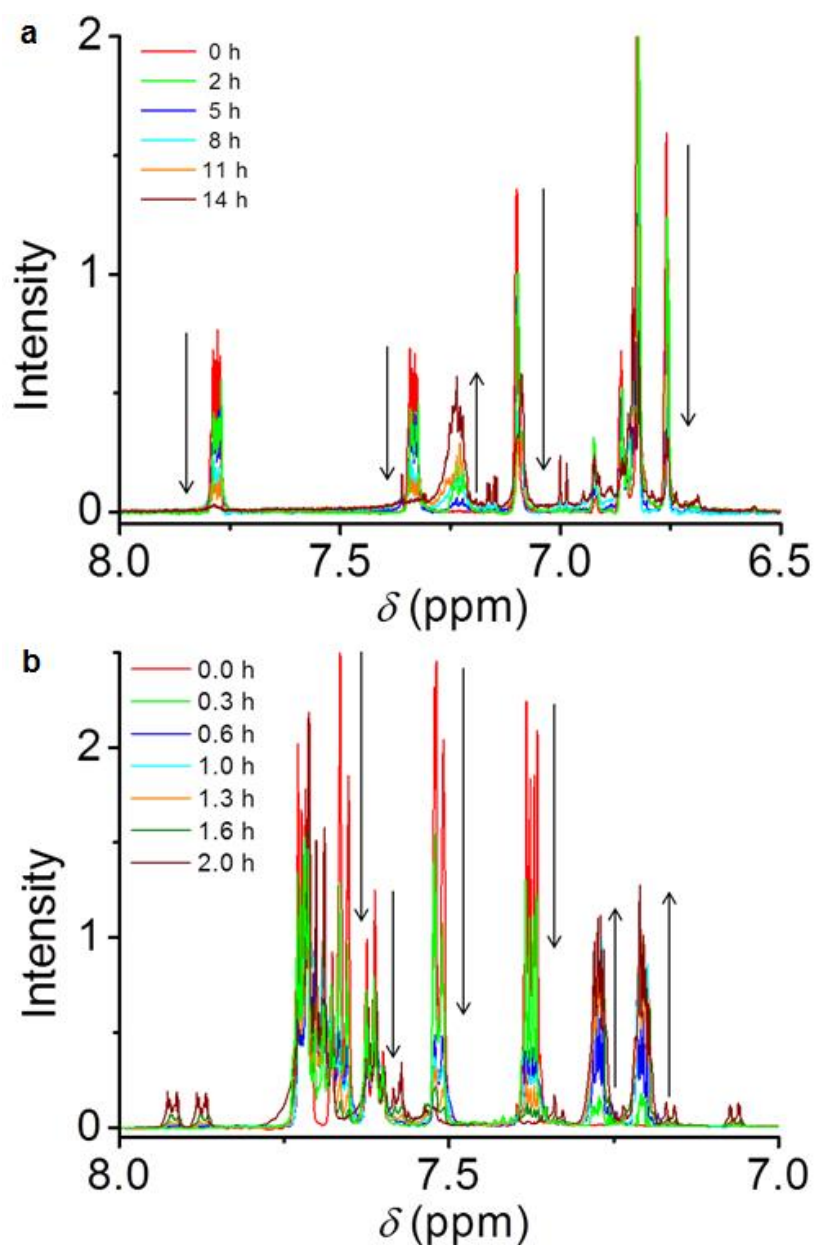

**Supplementary Figure S8 |  $^1\text{H}$  NMR changes of upon photo irradiation.** Variation of the  $^1\text{H}$  NMR signal intensity of aromatic protons of (a) **1** and (b) **4** in dichloromethane- $d_2$  solution from (a) 0 h to 14 h and (b) 0 h to 2 h irradiations, respectively, at 365 nm using a Xe lamp ( $100 \text{ W m}^{-2}$ ) at solvent-free film samples.



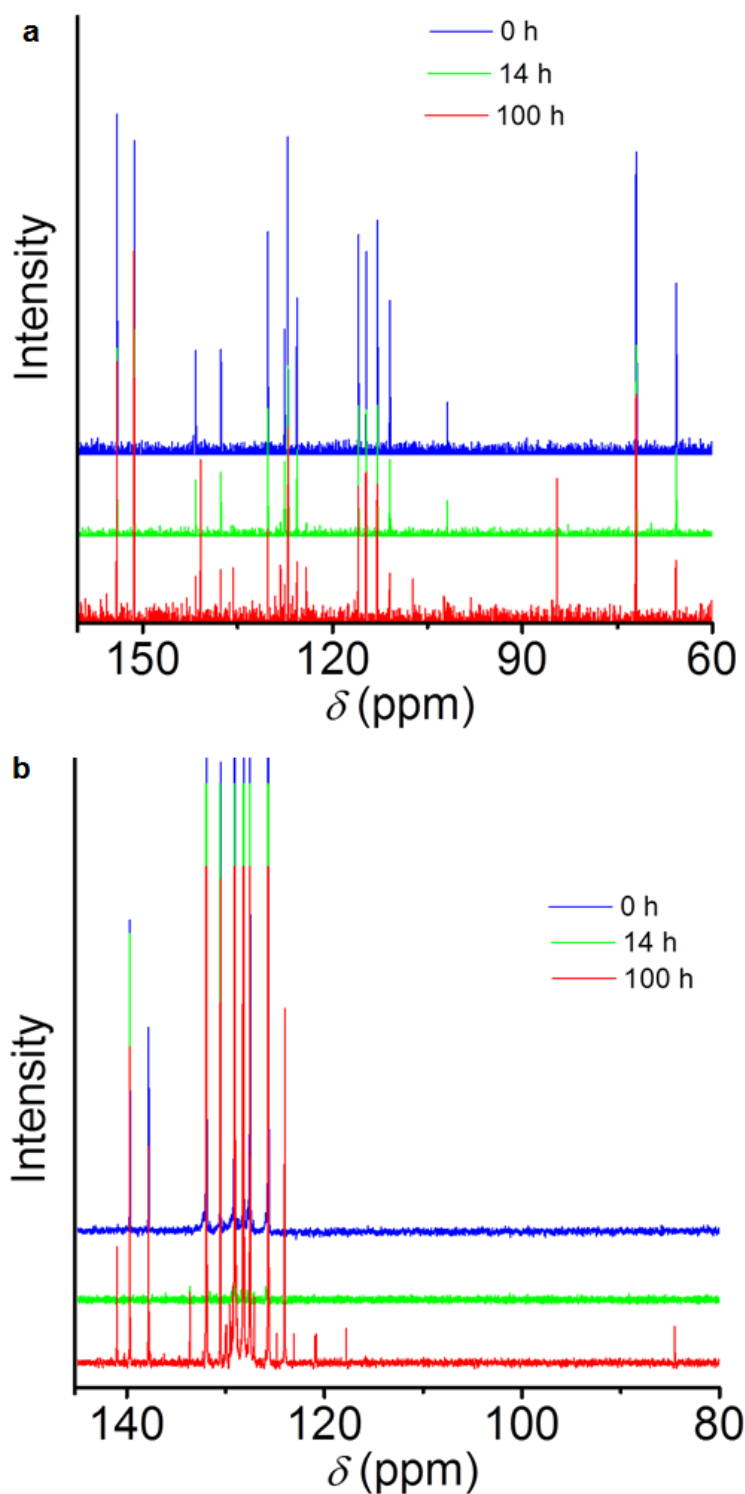

**Supplementary Figure S9 |  $^{13}\text{C}$  NMR changes upon photo irradiation.** Variation of the  $^{13}\text{C}$  NMR signal intensity (60-160 ppm) of (a) **1** (60-160 ppm) and (b) **4** (80-145 ppm) in dichloromethane- $d_2$  solution from 0 h to 100 h irradiations at 365 nm using a Xe lamp ( $100 \text{ W m}^{-2}$ ). The solutions used for  $^{13}\text{C}$  experiments were more highly concentrated (20 mg/1g of  $\text{CD}_2\text{Cl}_2$ ), hence longer photo irradiation time was required.

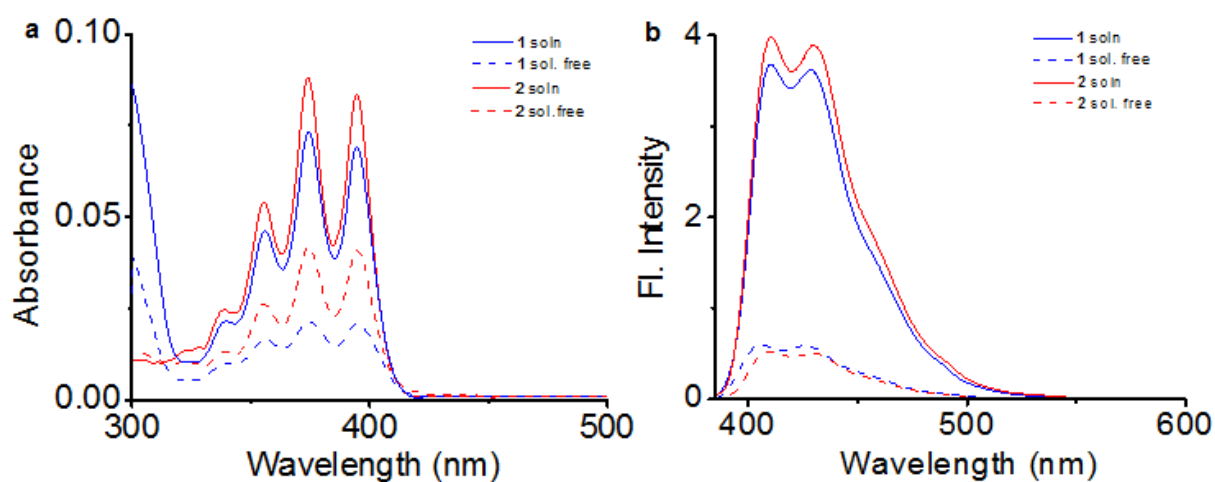

**Supplementary Figure S10 | Absorption and emission spectra with real intensity.** Raw data of (a) absorption spectra and (b) emission spectra of **1** (blue) and **2** (red) in solvent free film and in dichloromethane solution ( $c = 5 \times 10^{-5}$  M,  $l = 1$  mm,  $\lambda_{\text{ex}} = 375$  nm).

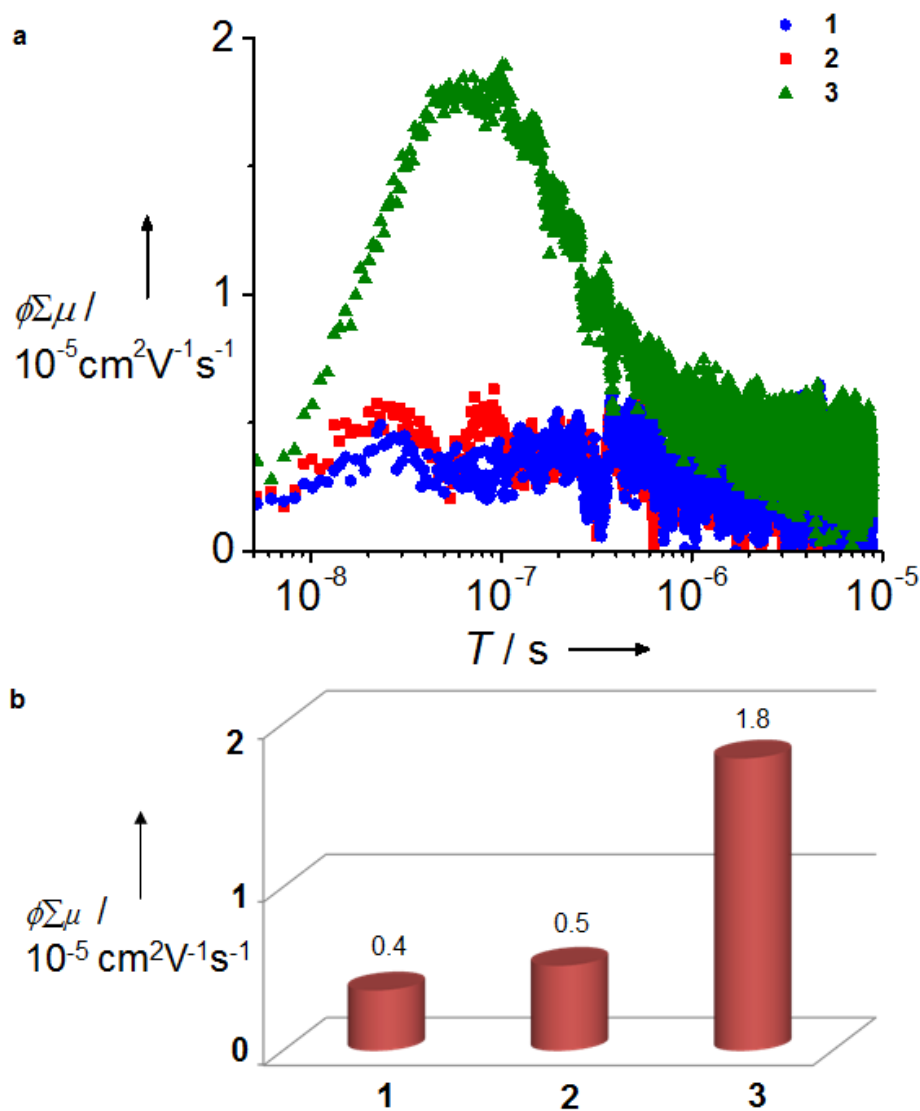

**Supplementary Figure S11 | Time resolved microwave conductivity studies.** (a) FP-TRMC transient decay profiles of liquid **1** (●), **2** (■) and solid **3** (▲) (x-axis is in logarithmic time scale) and (b) comparison of the transient maxima of **1**, **2** and **3** under an excitation at  $\lambda = 355 \text{ nm}$  by  $1.8 \times 10^{16} \text{ photons cm}^{-2} \text{ pulse}^{-1}$ . Transient photoconductivity ( $\phi \Sigma \mu$ , the product of the quantum efficiency of the charge carrier generation ( $\phi$ ) and the sum of the nanometer-scale charge-carrier mobilities ( $\Sigma \mu$ )), has been measured by irradiating with a  $\lambda = 355 \text{ nm}$  laser pulse. The transient photoconductivity was low for both **1** and **2** (in the order of  $10^{-6} \text{ cm}^2 \text{ V}^{-1} \text{ s}^{-1}$ ), clearly indicating that core isolation effectively controls the optoelectronic properties. The  $\phi \Sigma \mu$  values exhibited by **1** and **2** are 3-4 times lower than for the reference molecule **3** which assembles in solid state at room temperature.

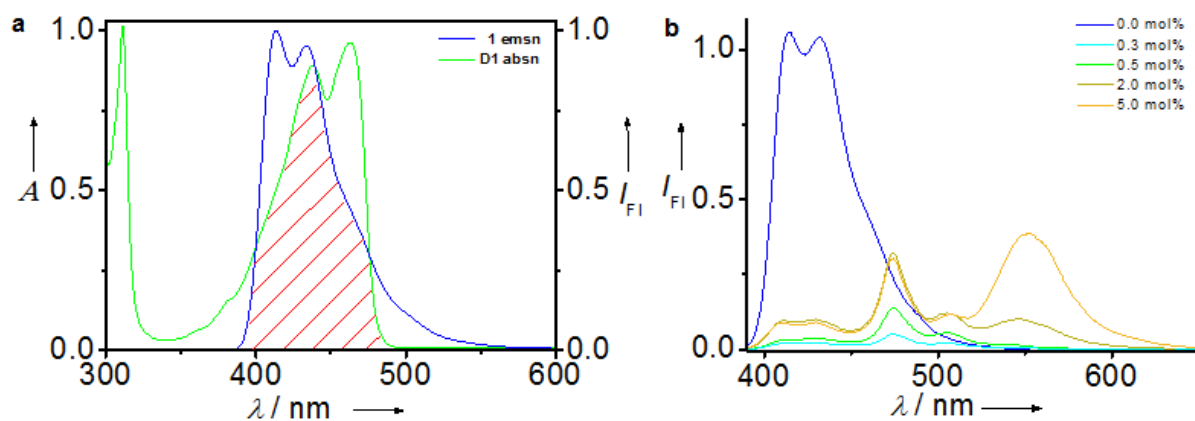

**Supplementary Figure S12 | Energy transfer studies of **1** and **D1**.** (a) Spectral overlap between the emission of **1** (blue) and the absorption of **D1** (green) in dichloromethane ( $c = 5 \times 10^{-5}$  M,  $l = 1$  mm,  $\lambda_{\text{ex}} = 375$  nm for **1**, 460 nm for **D1**). (b) Raw data of the emission spectral changes of **1** upon increasing the concentration of **D1** (0.3-5.0 mol%) ( $\lambda_{\text{ex}} = 350$  nm) in the solvent-free state supported on a quartz plate.

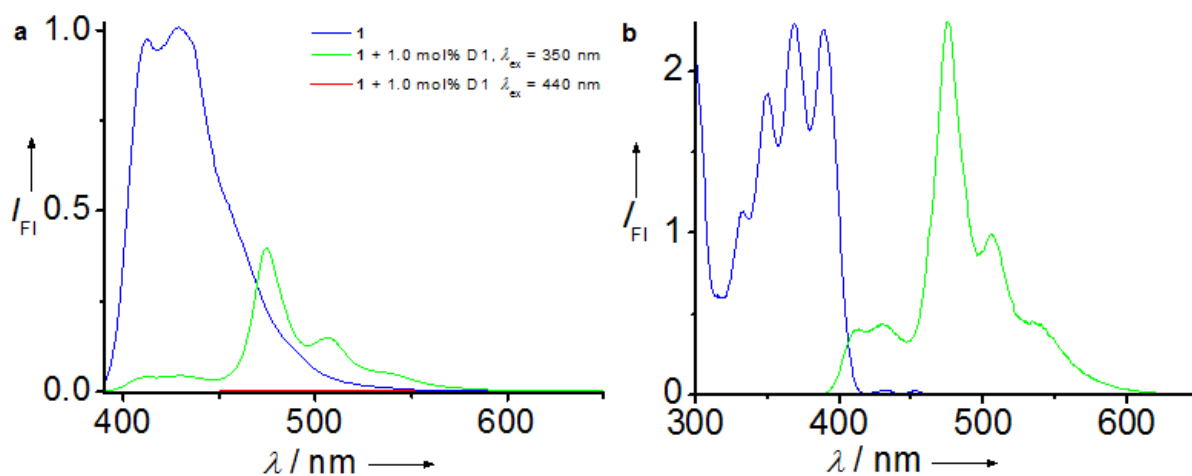

**Supplementary Figure S13 | Energy transfer studies of 1 and 1.0 mol% of D1.** (a) Fluorescence spectra (blue) of 1 ( $\lambda_{\text{ex}} = 350 \text{ nm}$ ), in the presence of 1.0 mol% of D1 upon exciting at  $\lambda = 350 \text{ nm}$  (green) and  $\lambda = 440 \text{ nm}$  (red) in the solvent-free state supported on quartz plate. (b) Normalised excitation (blue) ( $\lambda_{\text{em}} = 475 \text{ nm}$ ) and fluorescence (green) spectra of 1 in the presence of 1.0 mol% of D1 upon exciting at  $\lambda = 350 \text{ nm}$  in the solvent-free state supported on quartz plate.

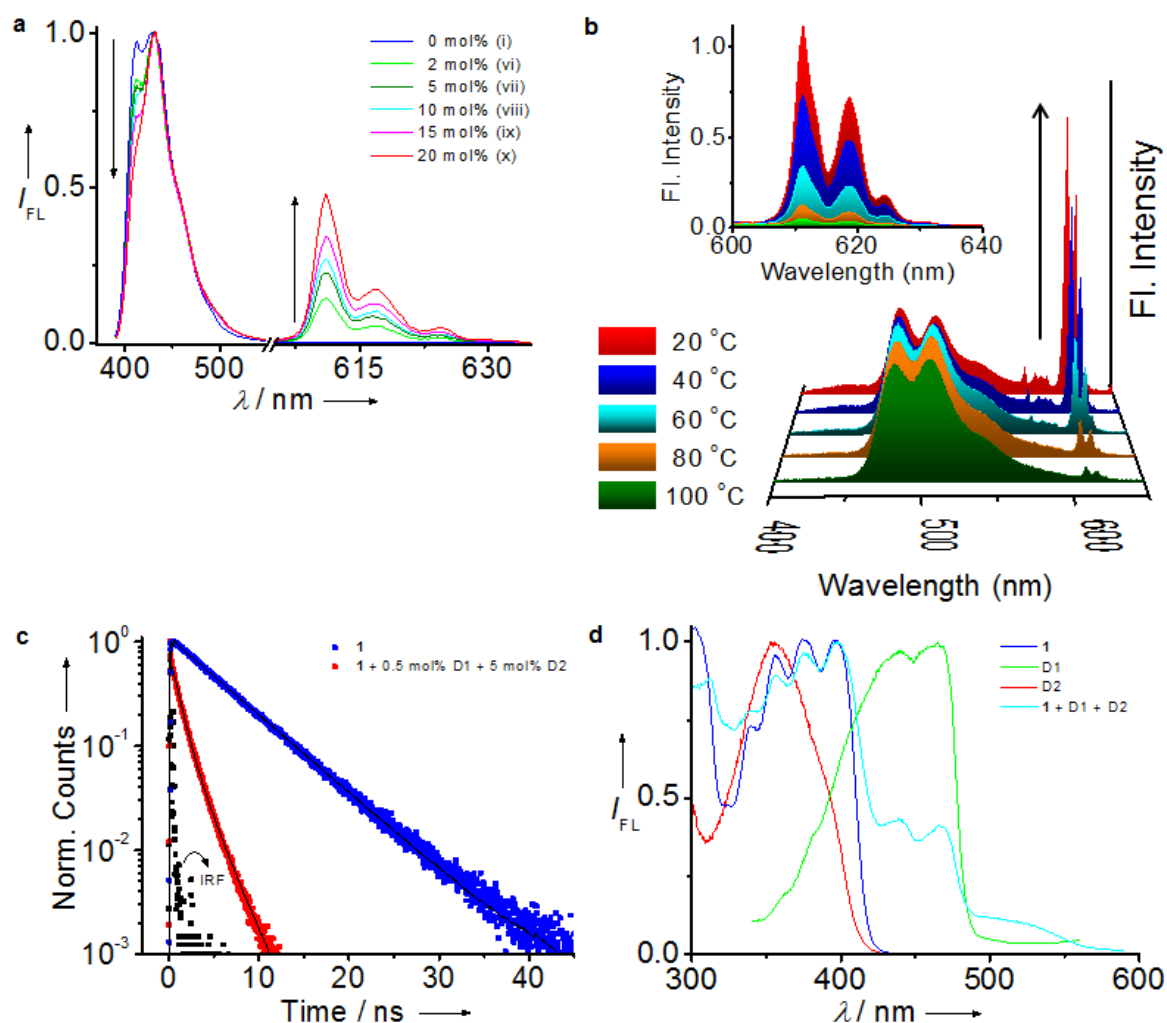

**Supplementary Figure S14 | Thermoresponsive doping studies.** (a) Normalized emission spectra of **1** in the presence of varying mol% of **D2** ( $\lambda_{\text{ex}} = 375$  nm) in the solvent-free state supported on quartz plate. (b) Thermoreversible luminescence spectral changes of the composite of **1**, **D1** and **D2** upon cooling, supported on a quartz plate ( $\lambda_{\text{ex}} = 375$  nm); inset shows the corresponding emission changes from 600-640 nm. (c) The fluorescence lifetime decay profiles of **1** in the absence (blue) and presence (red) of dopants **D1** (0.5 mol%), **D2** (5 mol%), monitored at 430 nm ( $\lambda_{\text{ex}} = 377$  nm) in the solvent-free state supported on quartz plate. (IRF = Instrument Response Function). (d) Normalized excitation spectra of **1** (—), **D1** (—), **D2** (—) and a combination of **1**, **D1** (0.5 mol %) and **D2** (5.0 mol %) (—) supported on quartz plate ( $\lambda_{\text{em}} = 430$  nm for **1**, 475 nm for **D1**, 610 nm for **D2** and 610 nm for composite).

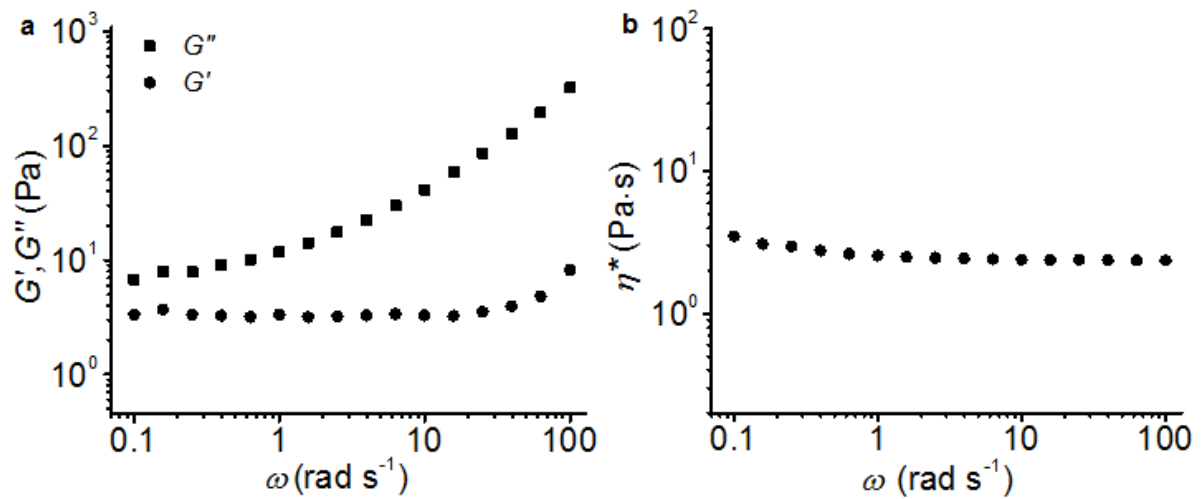

**Supplementary Figure S15 | Rheology of composites.** Variation of (a) storage modulus ( $G'$ ) (●) and loss modulus ( $G''$ ) (■) versus angular frequency on double logarithmic scale, and (b) complex viscosity ( $\eta^*$ ) versus angular frequency on double logarithmic scale for composite of **1**, **D1** (0.5 mol%) and **D2** (5 mol%), shear strain ( $\gamma$ ) = 0.1.

**Supplementary Table S1.** Fluid and optical characteristics of anthracenes **1** and **2**.

| <b>Compound</b> | <b>Glass<br/>Transition<br/>Temperature</b><br>$T_g$ (°C) | <b>Molar<br/>Heat<br/>Capacity</b><br>$C_{mol}$<br>(J mol <sup>-1</sup> K <sup>-1</sup> ) | <b>Complex<br/>Viscosity</b><br>( $\omega = 10$ rad<br>s <sup>-1</sup> ),<br>$\eta^*$ (Pa·s) | <b>Refracti<br/>ve Index</b><br>$n_D^{20}$ | <b>Absolute<br/>QY (<math>\Phi_f</math>)</b><br>sol.-free<br>bulk at rt | <b>Absolute<br/>QY (<math>\Phi_f</math>)</b><br>sol.-free<br>bulk at<br>77K |
|-----------------|-----------------------------------------------------------|-------------------------------------------------------------------------------------------|----------------------------------------------------------------------------------------------|--------------------------------------------|-------------------------------------------------------------------------|-----------------------------------------------------------------------------|
| <b>1</b>        | -59.6                                                     | 1955.1                                                                                    | 0.28                                                                                         | 1.516                                      | 0.54                                                                    | 0.65                                                                        |
| <b>2</b>        | -32.4                                                     | 389.6                                                                                     | 84.0                                                                                         | 1.532                                      | 0.55                                                                    | 0.64                                                                        |



**Supplementary Table S2.** Photophysical parameters of anthracenes **1-3** in dilute CH<sub>2</sub>Cl<sub>2</sub> solution.

| <b>Compound</b> | $\lambda_{\max}$<br>(abs) | $\epsilon$<br>(M <sup>-1</sup> cm <sup>-1</sup> ) | $\log \epsilon$ | $\lambda_{\max}$<br>(em) | <b>Absolute QY (<math>\Phi_f</math>)</b><br>CH <sub>2</sub> Cl <sub>2</sub><br>(1 x 10 <sup>-5</sup> M) |
|-----------------|---------------------------|---------------------------------------------------|-----------------|--------------------------|---------------------------------------------------------------------------------------------------------|
| <b>1</b>        | 374                       | 15,300                                            | 4.18            | 413                      | 0.97                                                                                                    |
| <b>2</b>        | 374                       | 16,000                                            | 4.20            | 410                      | 0.96                                                                                                    |
| <b>3</b>        | 375                       | 15,400                                            | 4.28            | 413                      | 0.98                                                                                                    |

**Supplementary Table S3.** CIE coordinate values of liquid anthracenes **1 (i)**, **2** and doped hybrid systems **ii-xv**.

| Trial        | CIE coordinate values | Trial       | CIE coordinate values |
|--------------|-----------------------|-------------|-----------------------|
| <b>1 (i)</b> | (0.11, 0.24)          | <b>viii</b> | (0.46, 0.17)          |
| <b>2</b>     | (0.11, 0.23)          | <b>ix</b>   | (0.55, 0.21)          |
| <b>ii</b>    | (0.20, 0.32)          | <b>x</b>    | (0.61, 0.27)          |
| <b>iii</b>   | (0.26, 0.50)          | <b>xi</b>   | (0.51, 0.40)          |
| <b>iv</b>    | (0.30, 0.45)          | <b>xii</b>  | (0.46, 0.42)          |
| <b>v</b>     | (0.33, 0.51)          | <b>xiii</b> | (0.40, 0.44)          |
| <b>vi</b>    | (0.29, 0.10)          | <b>xiv</b>  | (0.34, 0.45)          |
| <b>vii</b>   | (0.37, 0.14)          | <b>xv</b>   | (0.27, 0.51)          |

## Supplementary Methods

### Synthesis of alkyl and alkyloxybenzyl bromide.<sup>13,17</sup>

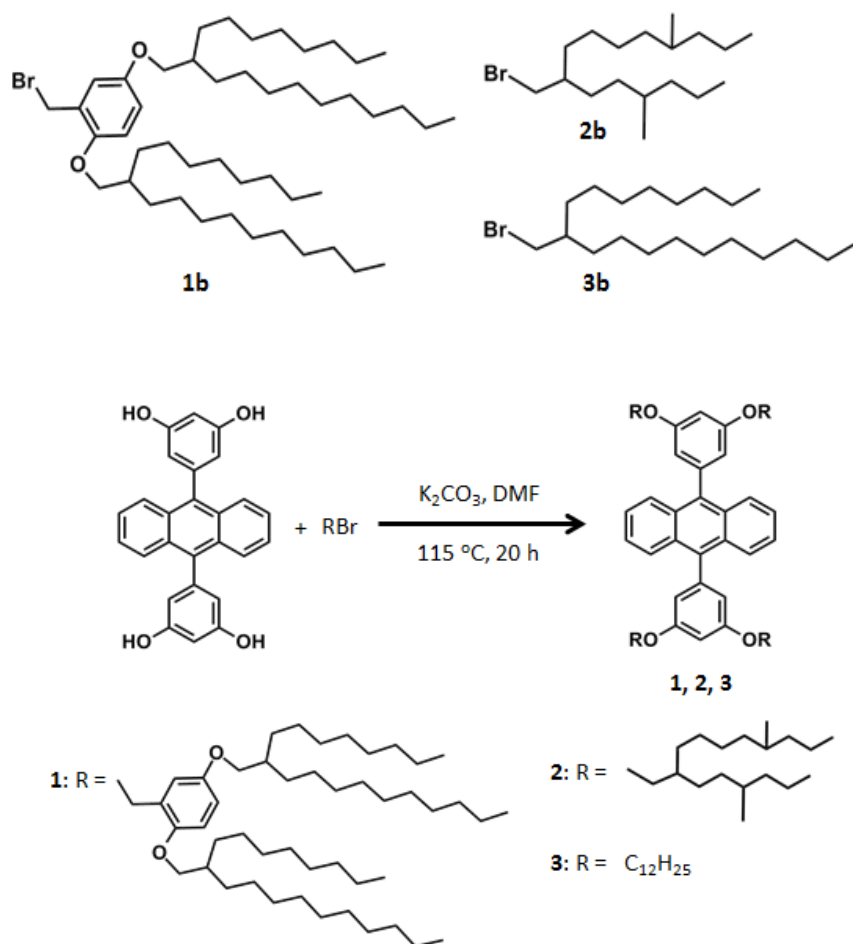

To a mixture of triphenylphosphine (PPh<sub>3</sub>, 7.87 g, 30 mmol) and carbon tetrabromide (CBr<sub>4</sub>, 5.97 g, 18 mmol) in 40 mL anhydrous THF, 15 mmol of the corresponding alkyl or alkyloxybenzyl alcohol dissolved in 10 mL anhydrous THF was added. The mixture was stirred for 30 min at room temperature under argon. The reaction mixture was filtered to remove insoluble solids, and THF was removed under reduced pressure. The residue was washed with *n*-hexane and filtered. Evaporation of *n*-hexane under reduced pressure followed by column chromatography (*n*-hexane) over silica gel yielded the pure compounds (**1b-3b**) as

colorless oily liquid in high yield (>90%). **1b**:  $^1\text{H}$  NMR (400 MHz,  $\text{CDCl}_3$ ):  $\delta$  3.70-3.16 (*m*, 2H), 2.10-0.55 (*m*, 35 H). **2b**:  $^1\text{H}$  NMR (400 MHz,  $\text{CDCl}_3$ ):  $\delta$  3.55-3.35 (*d*, 2H), 1.66-1.52 (1H), 1.46-1.15 (32H), 1.00-0.75 (*t*, 6H). **3b**:  $^1\text{H}$  NMR (400 MHz,  $\text{CDCl}_3$ ),  $\delta$  6.89-6.93 (*s*, 1H, Ar), 6.77-6.84 (*m*, 2H, Ar), 4.53-4.60 (*s*, 2H, Br- $\text{CH}_2$ -Ar), 3.75-3.92 (*m*, 4H, OCH<sub>2</sub>), 1.76-1.87 (*m*, 2H, CH(CH<sub>2</sub>)<sub>3</sub>), 1.10-1.47 (*m*, 64H, CH<sub>2</sub>), 0.85-0.97 (*m*, 12H, CH<sub>3</sub>); MALDI-TOF-MS, (matrix-dithranol): calculated for C<sub>47</sub>H<sub>87</sub>BrO<sub>2</sub> 764.10; found 763.95 [M<sup>+</sup>].
